# Supplementary material for: A Quantitative Framework for Measuring Personalized Medicine Integration into US Healthcare Delivery Organizations
Source: J Pers Med. 2021 Mar 12;11(3):196. doi: 10.3390/jpm11030196 (PMC8000405; doi:10.3390/jpm11030196)
Supplement: Supplementary file 1 [file jpm-11-00196-s001.pdf]

## **A Quantitative Framework for Measuring Personalized Medicine Integration into US Healthcare Delivery Organizations**

Arushi Agarwal, Daryl Pritchard, Laura Gullett, Kristen Garner Amanti, and Gary Gustavsen

---

### **Supplementary Materials**

#### **Questionnaire S1: Screener Questions for Survey Participants**

1. Which of the following best describes your primary role/department?
  - a. Laboratory
  - b. Biomedical/Clinical Engineering/EBME (Electro-Biomedical Engineering) **[THANK AND TERMINATE]**
  - c. C-Suite Management
  - d. Facilities/Maintenance/Estates Management/Building Services **[THANK AND TERMINATE]**
  - e. Imaging **[THANK AND TERMINATE]**
  - f. Information Technology/Informatics/Medical Informatics
  - g. Nursing **[THANK AND TERMINATE]**
  - h. Patient Safety/Risk Management **[THANK AND TERMINATE]**
  - i. Pharmacy **[THANK AND TERMINATE]**
  - j. Purchasing/Materials Management **[THANK AND TERMINATE]**
  - k. Respiratory Therapy **[THANK AND TERMINATE]**
  - l. Surgery **[THANK AND TERMINATE]**
  - m. Clinical/Quality Research **[THANK AND TERMINATE]**
  - n. Other **[THANK AND TERMINATE]**
2. Which of the following best describes your organization?
  - a. Health System
  - b. Integrated Delivery Network (i.e. health system providing insurance plan)
  - c. Independent Hospital
  - d. Government-Affiliated Hospital (e.g., VA)
  - e. **[If (A) Selected in Q1]** Independent Laboratory **[THANK AND TERMINATE]**
  - f. Private Practice **[THANK AND TERMINATE]**
  - g. Other **[THANK AND TERMINATE]**
3. How long have you worked at your current organization?
  - a. Less than 1 year **[THANK AND TERMINATE]**
  - b. 1-5 years
  - c. 6-10 years
  - d. 16-25 years
  - e. More than 25 years
4. How many hospitals does your organization have?

- a. None **[THANK AND TERMINATE]**
  - b. 1
  - c. 2-5
  - d. 6-10
  - e. 11-25
  - f. 26+
5. Where is the headquarters of your organization?
- a. Northeast (CT, MA, ME, NH, NJ, NY, PA, RI, VT)
  - b. South (AL, AR, DC, DE, FL, GA, KY, LA, MD, MI, NC, OK, SC, TN, TX, VA, WV)
  - c. Midwest (IA, IL, IN, KS, MI, MN, MO, NE, ND, OH, SD, WI)
  - d. West (AK, AZ, CA, CO, HI, ID, MT, NM, NV, OR, UT, WA, WY)
  - e. Outside of the US **[THANK AND TERMINATE]**
6. Which of the following does your organization include? Select all that apply.
- a. Teaching Hospital(s)
  - b. Clinical Trials
  - c. Medical School
7. For which of the following clinical areas does your organization treat patients? Select all that apply.
- a. Oncology
  - b. Rare/Undiagnosed Diseases
  - c. Chronic Diseases
  - d. Preventive/Healthy Patient Care
  - e. Prenatal/Neonatal Care
  - f. I don't know **[THANK AND TERMINATE]**
8. For which of the following clinical areas do physicians at your organization use any personalized medicine approaches? Select all that apply.
- Personalized medicine encompasses any therapeutic interventions that are tailored based on the unique physiological or biological characteristics (often genetic/molecular) of an individual or disease state.*
- a. Oncology
  - b. Rare/Undiagnosed Diseases
  - c. Pharmacogenomics/Chronic Diseases
  - d. Preventive/Healthy Patient Care
  - e. Prenatal/Neonatal Care
  - f. None **[THANK AND TERMINATE]**
  - g. I don't know **[THANK AND TERMINATE]**
9. **[If (A) Selected in Q1]** How would you classify your primary laboratory?
- a. Research laboratory **[THANK AND TERMINATE]**
  - b. Clinical laboratory

- c. Other **[THANK AND TERMINATE]**
10. **[If (A) Selected in Q1]** Which of the following most closely matches your title or role?
- a. Laboratory director
  - b. Laboratory manager/supervisor
  - c. Staff pathologist **[THANK AND TERMINATE]**
  - d. Laboratory tech, lead tech, or medical tech **[THANK AND TERMINATE]**
11. **[If (A) Selected in Q1]** Which sections of the laboratory do you manage and/or supervise? Select all that apply.
- a. Histology
  - b. Cytology
  - c. Cytogenetics
  - d. Flow cytometry
  - e. Clinical chemistry
  - f. Immunoassay
  - g. Coagulation
  - h. Hematology
  - i. Urinalysis
  - j. Molecular (e.g., PCR, NGS, etc.) **[THANK AND TERMINATE IF NOT SELECTED]**
  - k. Microbiology
12. **[If (A) Selected in Q1]** For which of the following clinical areas do you directly supervise/manage testing? Testing may be performed either in-house or as send-outs. Select all that apply.
- a. Virology (e.g., HIV, HCV testing)
  - b. Women's health (e.g., HPV, STI testing)
  - c. Infectious disease (e.g., MRSA, *C. difficile* testing)
  - d. Oncology (e.g., BRAF mutation testing)
  - e. Rare/Undiagnosed Diseases
  - f. Pharmacogenomics
  - g. Prenatal/Neonatal Screening
  - h. Healthy Patient Screening

**[THANK AND TERMINATE IF ONCOLOGY, RARE/UNDIAGNOSED DISEASES, PHARMACOGENOMICS, PRENATAL/NEONATAL SCREENING OR HEALTHY PATIENT SCREENING NOT SELECTED]**

13. **[If (F) Selected in Q1]** Which of the following best describes your role?
- a. Administrator **[THANK AND TERMINATE]**
  - b. Director **[THANK AND TERMINATE]**
  - c. Manager **[THANK AND TERMINATE]**
  - d. Supervisor **[THANK AND TERMINATE]**
  - e. Vice President
  - f. C-Suite Executive
  - g. Other **[THANK AND TERMINATE]**

14. **[If (C) Selected in Q1 OR (F) Selected in Q13]** Which of the following best describes your title?

- a. Chief Informatics Officer
- b. Chief Medical Informatics Officer/Chief Clinical Informatics Officer
- c. Chief Medical Officer
- d. Chief Nursing Informatics Officer **[THANK AND TERMINATE]**
- e. Chief Executive Officer **[THANK AND TERMINATE]**
- f. Chief Financial Officer **[THANK AND TERMINATE]**
- g. Other **[THANK AND TERMINATE]**

15. **[If (A) Selected in Q14]** Which of the following degrees do you hold? Select all that apply.

- a. MD
- b. PhD
- c. MBA
- d. Other Master's
- e. Bachelor's
- f. Other (please specify)

**[THANK AND TERMINATE IF (A) SELECTED IN Q14 AND (A) NOT SELECTED IN Q15]**

16. **[If (C) or (F) Selected in Q1]** What responsibilities fall under your purview? Select all that apply.

- a. Selecting enterprise healthcare technology for health system
- b. Ensuring reliability, scalability, and affordability of IT infrastructure
- c. Optimizing quality, safety, and efficiency in clinician workflows
- d. Establishing clinician consensus for decision support rules
- e. Supporting regulatory compliance and privacy protections
- f. Integrating genomic data into medical records
- g. Implementing telehealth solutions

**[THANK AND TERMINATE IF (F) NOT SELECTED]**

17. **[If (C) or (F) Selected in Q1]** Which of the following best describes your involvement in technology purchasing decisions?

- a. I am the sole decision-maker
- b. I make the decision jointly with my colleagues
- c. I am a member of a committee that makes the decision
- d. I understand how the decision is made but am not part of the process **[THANK AND TERMINATE]**
- e. I am not part of nor have visibility into the decision-making process **[THANK AND TERMINATE]**

18. Which of the following best describes the integration of genomic data into your organization's EHR?

- a. Genomic data is scanned or uploaded in PDF form to a patient's EHR record
- b. The EHR has specific structured data fields for genomic data; these fields must be manually populated

- c. The EHR has specific structured data fields for genomic data; these fields are automatically populated
  - d. I don't know **[THANK AND TERMINATE]**
19. Which of the following best describes your involvement in your organization's personalized medicine initiatives?
- a. I spearhead personalized medicine initiatives
  - b. I am a member of a committee that oversees personalized medicine initiatives
  - c. I am well aware of my organization's personalized medicine initiatives across therapeutic areas, but am not directly involved
  - d. I am only somewhat aware of my organization's personalized medicine initiatives and am not directly involved **[THANK AND TERMINATE]**
  - e. I am neither aware of nor involved in my organization's personalized medicine initiatives **[THANK AND TERMINATE]**
